# Supplementary material
Source: publisher site journal article supplement (https://www.dovepress.com/article/556192)
Supplement: Supplementary file 1 [file 556192%20Supplementary%20Table%201.xlsx]

**TABLE 1 esupplement Empiric treatment in different categories**

|                                                       | Received MRSA covering empiric treatment (n=24) | Did not receive MRSA covering empiric treatment (n=107) | P-value |
|-------------------------------------------------------|-------------------------------------------------|---------------------------------------------------------|---------|
| <b>Infection type</b>                                 |                                                 |                                                         | 0.176   |
| Abscess                                               | 5 (11.4 %)                                      | 39 (36.4 %)                                             |         |
| Bacteremia                                            | 0                                               | 1 (0.9 %)                                               |         |
| Cellulitis                                            | 1 (4.2 %)                                       | 6 (5.6 %)                                               |         |
| Fresh wound                                           | 3 (12.5 %)                                      | 5 (4.7 %)                                               |         |
| Furunculosis                                          | 3 (12.5 %)                                      | 3 (2.8 %)                                               |         |
| Respiratory and head and neck infection               | 3 (12.5 %)                                      | 7 (6.5 %)                                               |         |
| Secondary infection of a chronic wound                | 3 (12.5 %)                                      | 16 (31.4 %)                                             |         |
| Surgical site infection                               | 4 (16.7 %)                                      | 26 (24.3 %)                                             |         |
| Urinary tract infection                               | 1 (4.2 %)                                       | 3 (2.8 %)                                               |         |
| Unknown                                               | 1 (4.2 %)                                       | 1 (0.9 %)                                               |         |
| <b>Born abroad (n=129)*</b>                           | 1 (4.2 %)                                       | 14 (13.3 %)                                             | 0.301   |
| <b>Medical history</b>                                | 24 (8.6 %)                                      | 107 (38.2 %)                                            | 0.941   |
| CCI 0                                                 | 13 (54.2 %)                                     | 53 (49.5 %)                                             |         |
| CCI 1-4                                               | 7 (29.2 %)                                      | 28 (26.2 %)                                             |         |
| CCI ≥5                                                | 2 (8.3 %)                                       | 15 (14.0 %)                                             |         |
| Unknown                                               | 2 (8.3 %)                                       | 11 (10.3 %)                                             |         |
| <b>Hospitalization due to MRSA infection (n=107)*</b> | 4 (20.0 %)                                      | 39 (44.8 %)                                             | 0.041   |
| <b>Age</b>                                            | 24 (8.6 %)                                      | 107 (38.2 %)                                            | 0.201   |

|                            |             |              |       |
|----------------------------|-------------|--------------|-------|
| <18 years                  | 6 (25.0 %)  | 14 (13.1 %)  |       |
| 18 - 64 years              | 15 (62.5 %) | 66 (61.7 %)  |       |
| ≥65 years                  | 3 (12.5 %)  | 27 (25.2 %)  |       |
| <b>Gender, male</b>        | 16 (66.7 %) | 53 (49.5 %)  | 0.129 |
| <b>HCW</b>                 | 1 (4.2 %)   | 10 (9.3 %)   | 0.688 |
| <b>Season of infection</b> | 24 (8.6 %)  | 107 (38.2 %) | 0.655 |
| January - March            | 8 (33.3 %)  | 30 (28.0 %)  |       |
| April - June               | 6 (25.0 %)  | 18 (16.8 %)  |       |
| July - September           | 7 (29.2 %)  | 38 (35.5 %)  |       |
| October - December         | 3 (12.5 %)  | 21 (19.6 %)  |       |

---

\*Number of cases with background data in question available and empiric treatment given known
